# Supplementary material
Source: ML conference proceedings conference paper supplement (https://openreview.net/forum?id=4CJqD161U9)
Supplement: supplementary_material [file Nonlinear_5000_500.pdf › code/causal-profiler-experiments/DCM/experiments/images/Nonlinear_5000_500.pdf]

# Nonlinear Equations

## Observational MMD

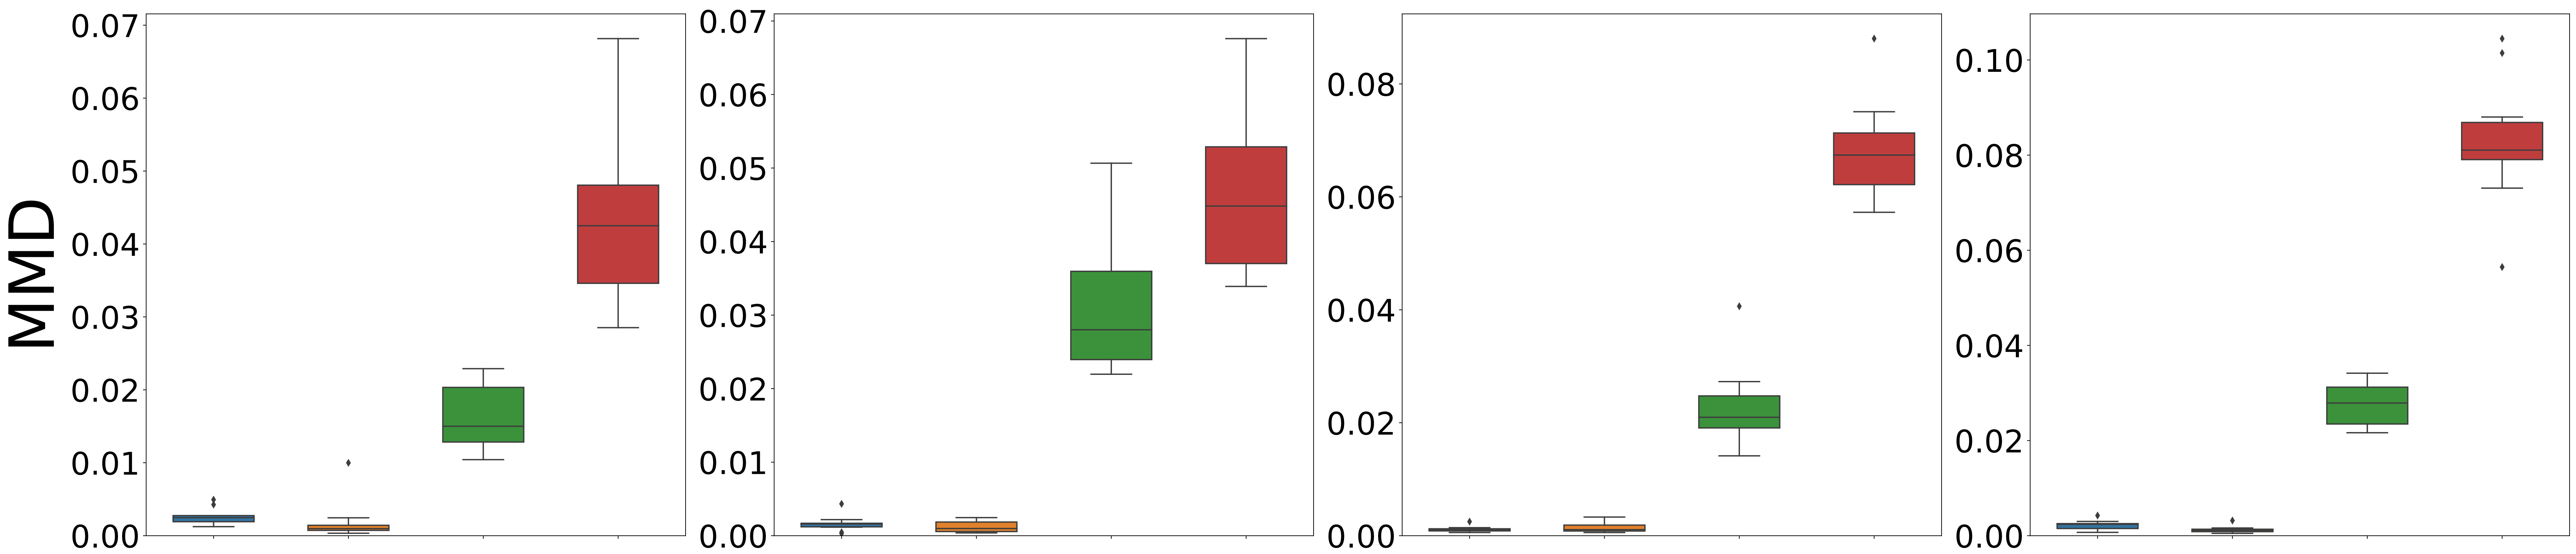

## Interventional MMD

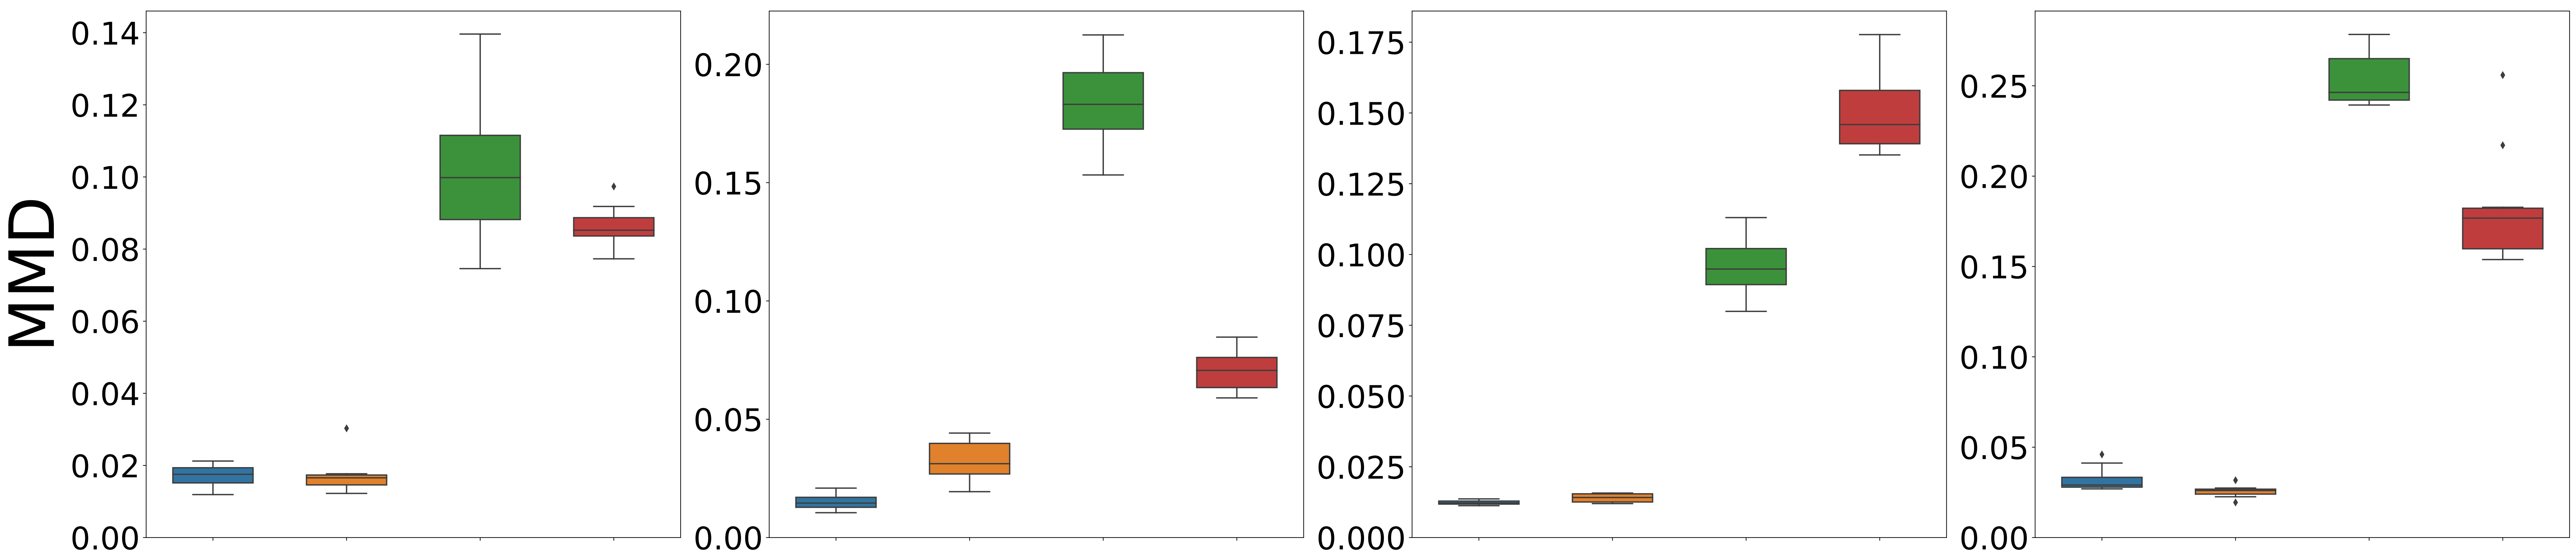

## Counterfactual MSE

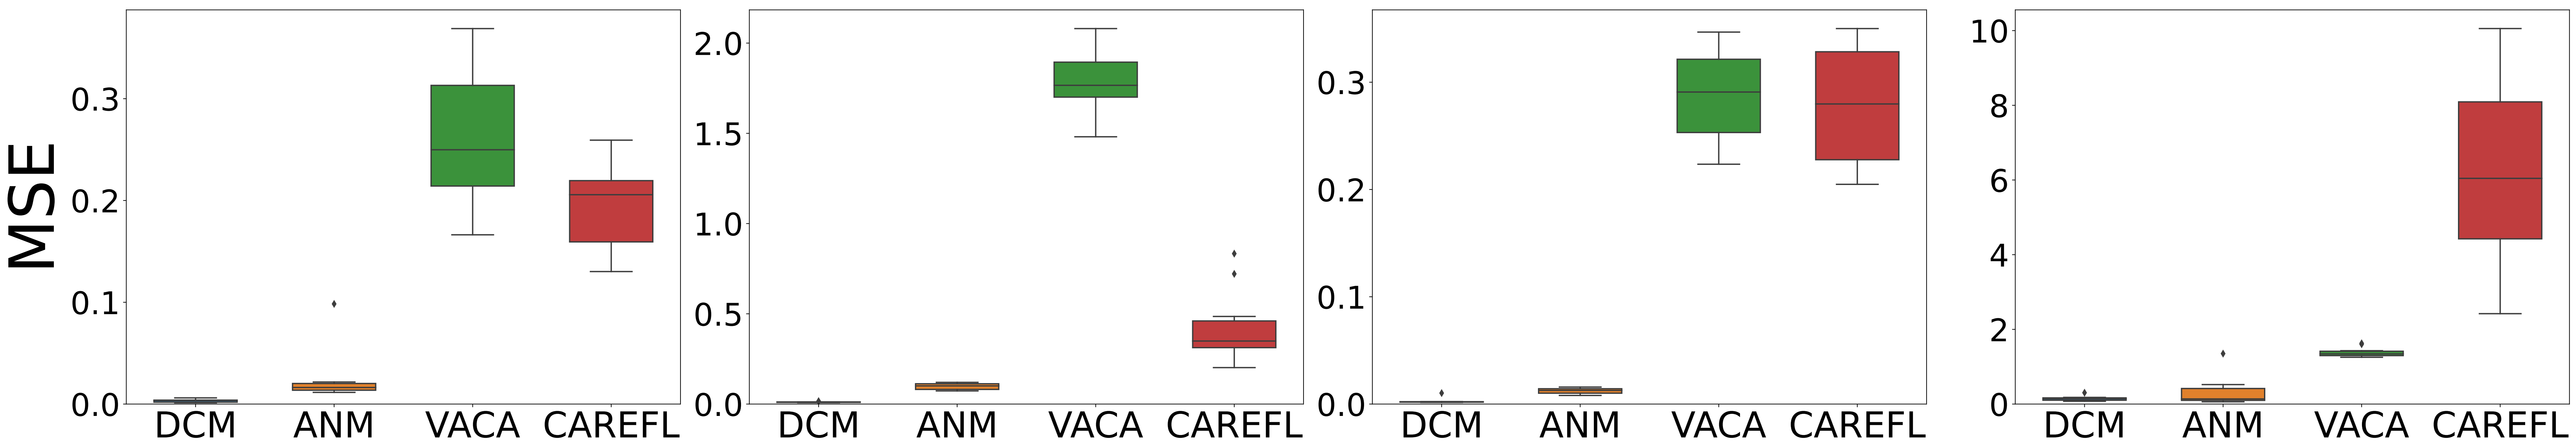

Chain

Triangle

Y

Diamond

Structural Causal Model
